# Supplementary material for: Multiswitchable photoacid–hydroxyflavylium–polyelectrolyte nano-assemblies
Source: publisher site journal article supplement (doi:10.3762/bjoc.17.17), 2021-01-19
Supplement: Additional file 1 [file 1860-5397-17-17-S1.pdf]

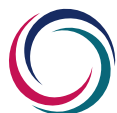

## Supporting Information

for

### Multiswitchable photoacid–hydroxyflavylium–polyelectrolyte nano-assemblies

Alexander Zika and Franziska Gröhn

*Beilstein J. Org. Chem.* **2021**, *17*, 166–185. [doi:10.3762/bjoc.17.17](https://doi.org/10.3762/bjoc.17.17)

### <sup>13</sup>C NMR assignments, UV–vis and light scattering data

**Table S1:**  $^{13}\text{C}$  NMR: Detailed signal assignment for different molecules. The color corresponds to the different molecules shown below.

| Number of C-Atom | ppm   |
|------------------|-------|
| 3                | 97.7  |
| 2                | 100.4 |
| 9                | 104.8 |
| 6                | 107.7 |
| 7                | 108.4 |
| 12               | 117.3 |
| 11               | 122.5 |
| 10               | 137.6 |
| 4                | 149.2 |
| 5                | 153.4 |
| 8                | 155.2 |
| 13               | 156.6 |
| 1                | 159.0 |
| 3/3              | 96.9  |
| 3                | 97.1  |
| 2                | 99.8  |
| 2/2              | 100.3 |
| 9                | 105.7 |
| 6/6              | 107.8 |
| 7/7              | 109.0 |
| 12/12            | 117.5 |
| 12               | 119.4 |
| 10               | 122.0 |
| 11               | 123.0 |
| 6                | 128.4 |
| 11               | 129.6 |
| 11               | 134.7 |
| 10               | 135.7 |
| 10               | 137.5 |
| 7                | 141.7 |
| 4/4/4            | 150.1 |
| 5                | 153.2 |
| 5                | 154.1 |
| 8/8              | 154.9 |
| 8                | 155.7 |
| 13/13/13         | 156.7 |
| 5                | 158.4 |
| 1/1/1            | 160.3 |
| 9                | 163.4 |
| 9                | 173.9 |

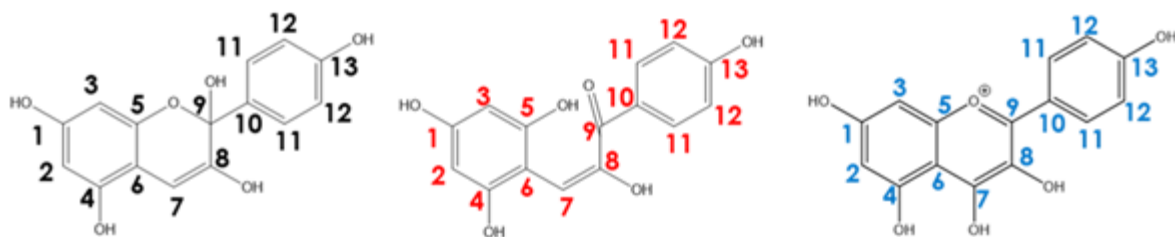

**Scheme S1:** Left: Flavy in form of **B**. Middle: Flavy in form of **Cc**. Right: Flavy in form of **B<sub>4</sub>**.

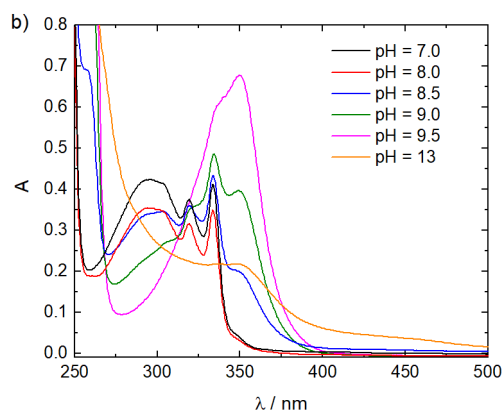

**Figure S1:** UV-vis of the photoacid 1N36S depending on the pH value of the solution.

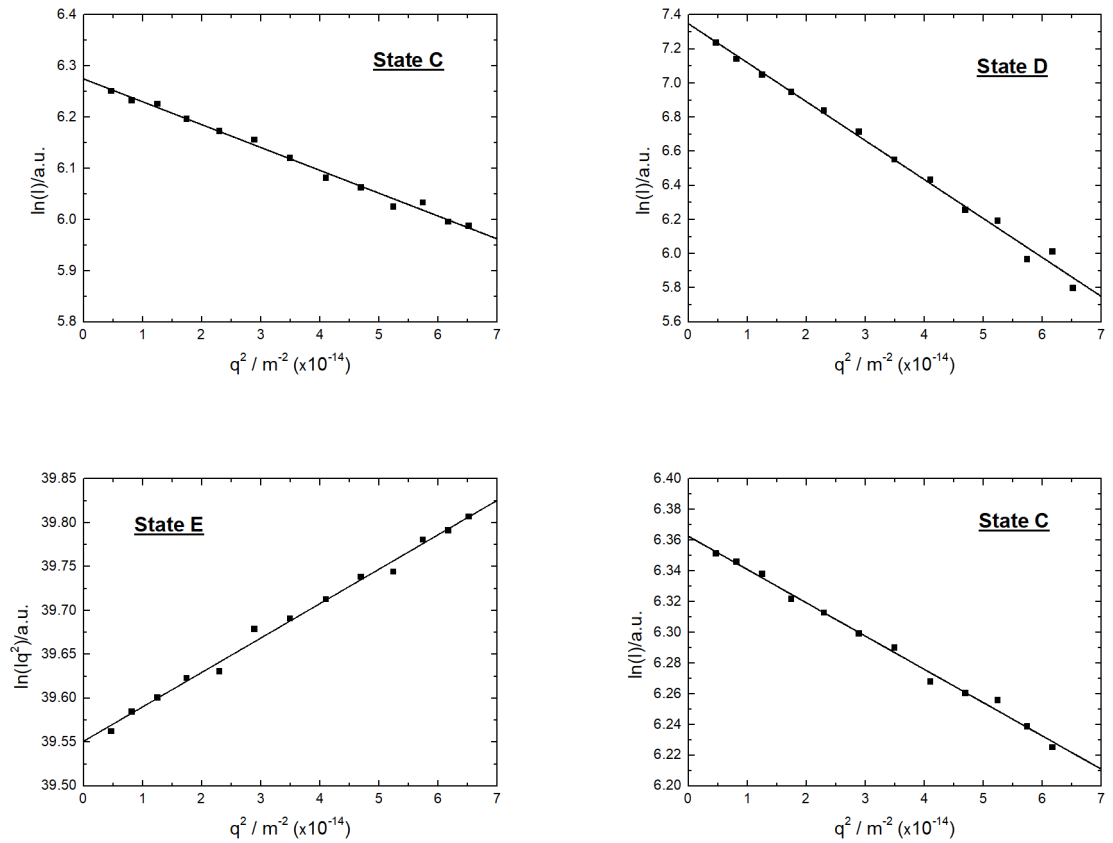

**Figure S2:** Static light scattering data from the assemblies of cycle II. Above left: **C:** pH 2.0. Above right: **D:** pH 5.0. Bottom left: **E:** Irradiation at  $\lambda = 300$  nm. Bottom right: **C:** Dark and acidic environment.

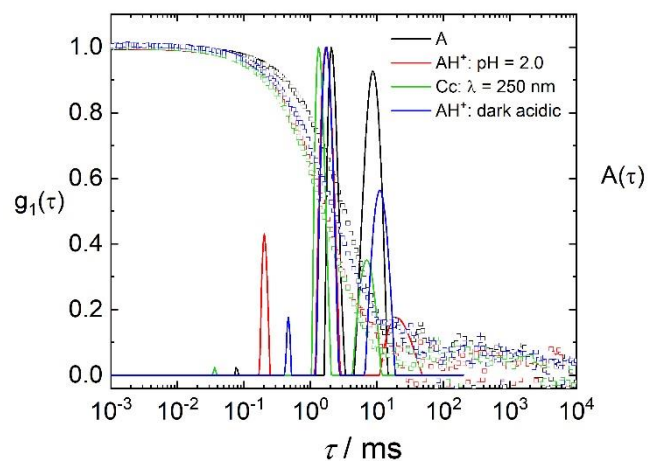

**Figure S3:** Electric field autocorrelation function  $g_1(\tau)$  and distribution of relaxation times  $A(\tau)$  at a scattering angle of  $\Theta = 90^\circ$  for the assemblies with the building blocks Flavy and PAA at a charge ratio of  $l = 0.5$ .

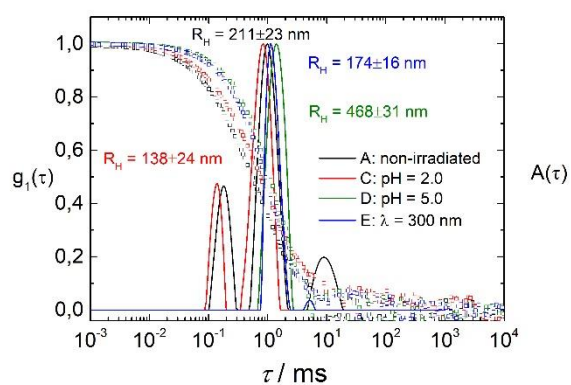

**Figure S4:** Electric field autocorrelation function  $g_1(\tau)$  and distribution of relaxation times  $A(\tau)$  at a scattering angle of  $\Theta = 90^\circ$  for the assemblies at a concentration ratio of  $l = 4.0$ .
